# Supplementary material for: Risk Factors for Liver Decompensation and HCC in HCV-Cirrhotic Patients after DAAs: A Multicenter Prospective Study
Source: MDPI journal article supplement (doi:10.3390/cancers13153810), 2021-07-29
Supplement: s1 [file s1]

# Risk Factors for Liver Decompensation and HCC in HCV-Cirrhotic Patients after DAAs: A Multicenter Prospective Study

Filomena Morisco, Alessandro Federico, Massimo Marignani, Mariarita Cannavò, Giuseppina Pontillo, Maria Guarino, Marcello Dallio, Paola Begini, Rosa G. Benigno, Flavia L. Lombardo and Tommaso Stroffolini

**Table S1.** Incidence rate (IR) per 100 person-years and relative rate (RR) of adverse events in SVR vs. no SVR cases (A), of Liver Decompensation and HCC in SVR according to Delta LSM (B) and Basal LSM value (C) in an Italian prospective study.

| Characteristic      |     |                      |                |                |                | Any Event       |
|---------------------|-----|----------------------|----------------|----------------|----------------|-----------------|
| Liver related death |     |                      |                |                |                |                 |
|                     |     | IR (95% CI)          |                | IR (95% CI)    | RR (95% CI)    |                 |
|                     |     |                      |                |                |                |                 |
| A                   |     |                      |                |                |                |                 |
| SVR                 | Yes |                      | 3.7 (2.9-4.8)  | 3.3 (1.3-8.2)  |                | 0.5 (0.2-1.0)   |
|                     | SVR | No                   |                | 9.0 (1.9-42.6) |                | 12.3 (5.1-29.6) |
|                     |     |                      | 4.3 (1.1-17.2) |                |                |                 |
| Characteristic      |     |                      |                |                |                |                 |
|                     |     | Liver Decompensation |                | HCC            |                |                 |
|                     |     | IR (95% CI)          | RR (95% CI)    | IR (95% CI)    | RR (95% CI)    |                 |
| B                   |     |                      |                |                |                |                 |
| Delta LSM           |     |                      |                |                |                |                 |
| ≥ 20%               |     |                      | 0.5 (0.2-1.6)  | 0.3 (0.1-1.4)  | 2.3 (0.4-11.8) |                 |
| < 20%               |     | 1.2 (0.3-5.4)        |                |                | 0.8 (0.3-1.9)  |                 |
|                     |     |                      | 0.6 (0.3-1.7)  |                |                |                 |
| C                   |     |                      |                |                |                |                 |
| Basal LSM value     |     |                      |                |                |                |                 |
| < 20 kPa            |     |                      | 0.4 (0.1-1.1)  | 0.3 (0.1-0.9)  | 8.3 (2.3-30.2) |                 |
| ≥ 20 kPa            |     | 5.5 (1.7-17.8)       |                |                | 2.5 (1.4-4.7)  |                 |
|                     |     |                      | 2.2 (1.2-4.3)  |                |                |                 |
